# Supplementary material
Source: PubMed Central journal article supplement (PMC4804767)
Supplement: supp_btv581_supplementary.pdf [file supp_btv581_supplementary.pdf]

# Supplementary Information

October 5, 2015

## 1 Flowchart of FALCON@home

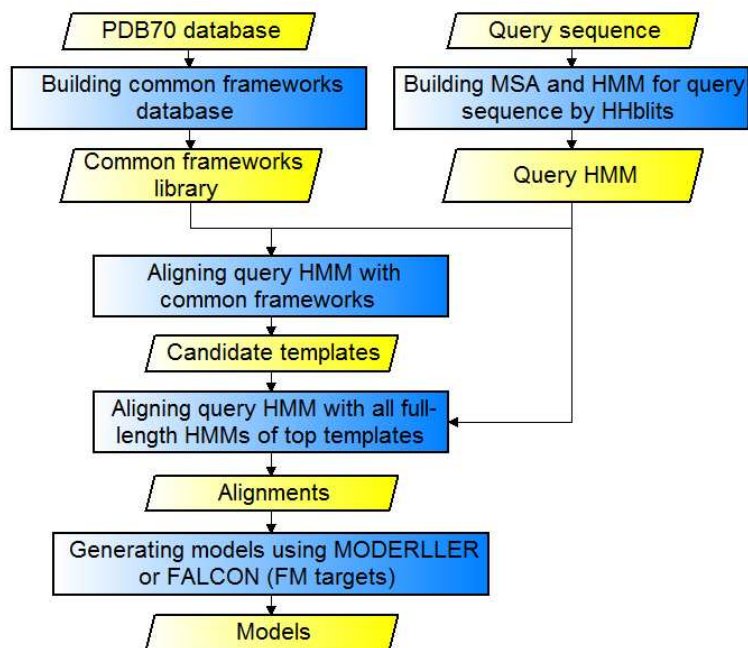

Figure S1: Flowchart of FALCON@home protein structure prediction server.

## 2 TBM module

In the TBM module, we first calculated the common structural frameworks, and then aligned the query protein against the common structural frameworks. The details of TBM module are described as below.

### 2.1 Identification of common framework shared by homologous proteins

For each template with known structure, all of its homologous proteins were first identified based on sequence and structure similarity. Then, an integer linear program was designed to identify the common framework shared by these homologous proteins. The constraints of the integer linear program guarantee the common framework to be conservative with respect to structure and sequence [1].

Figure S2 shows the common framework identified for protein 1b7y\_A as an example. In general, a common framework consists of a set of dispersed conserved segments. The sequence profiles, profile hidden Markov models (HMM) of these segments, as well as the lengths of the gaps between neighboring segments, are stored for further fold recognition and alignment steps.

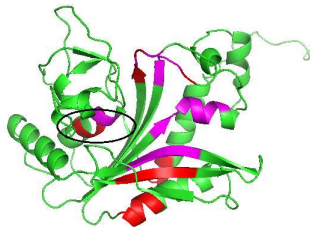

Figure S2: Common framework (in red and purple) shared by protein 1b7y\_A and its homologous proteins.

### 2.2 Alignment of the query protein against the common frameworks

We aligned a given query protein sequence against the identified common frameworks to avoid vague alignments rooted in the structurally variable

segments of templates. Specifically, using profile HMMs as a generative model, the probability of the query protein generated from a certain common framework was first calculated. The probability consists of two parts, i.e., the probability that the conserved segments generate the matched segments in query protein and the probability that gaps in the framework generates unmatched segments in query proteins. The common frameworks with high probability were kept for final model generation.

After recognizing the likely folds by searching against the common frameworks, the full-length alignments were generated via aligning the query sequence against identified templates using TreeThreader [2, 3]. The final structural models were generated by MODELLER [4] and selected according to the dDFIRE [5] energy function.

### 3 FALCON *ab initio* module

FALCON [6] is an *ab initio* prediction approach that generates models from the very beginning following an iterative strategy. To be specific, FALCON uses *Cosine* model to describe the local bias of torsion angle pair  $(\phi, \psi)$  of each residue. A position specific HMM is used to capture the dependencies among local biases of adjacent residues, based on carefully selected fragments. The Fragment-HMM is used to sample a sequence of torsion angle pairs for the given protein sequence. ROSETTA energy function is used to evaluate the generated decoys, and to direct the sampling process to the better decoys. The generated decoys are fed back to produce more accurate estimations of local structural biases, a more accurate Fragment-HMM and thus, better decoys. This step is executed iteratively to increase the quality of the final decoys, until convergence.

In addition, we have tuned the weight of each ROSETTA energy item when generating the model [7] and ranked the models according to the combined energy scores of dDFIRE [5] and ROSETTA [8].

## 4 The performance of FALCON@home and HHsearch+Modeller in CASP11 evaluation

We registered a total of four servers in the CASP11 competition. Among these servers, the FALCON\_TOPO server is equivalent to FALCON@home (ranked 12th over TBM domains and 16th over FM domains according to the Assessors' formula). Another server, called FALCON\_EnvFold, is an enhanced version of FALCON@home—besides the sequence information used in FALCON@home, local structural information is also employed to build query-template alignment in FALCON\_EnvFold. In CASP11, FALCON\_EnvFold was ranked 9th over TBM category according to GDT\_TS measure. Notice that the CASP11 website lists only the overall performance of each participating server, which states that FALCON\_TOPO was ranked 12th and HHpredA was ranked 17th over the 81 TBM domains. For the sake of detailed performance comparison, we listed the prediction model quality for each query protein individually. In particular, we first downloaded from CASP11 website the models predicted by FALCON\_TOPO and HHpredA; then we run TM-score to calculate GDT\_TS of each predicted model. Over the total of 105 TBM and FM domains, FALCON\_TOPO showed comparable performance with HHpredA, and outperformed HHpredA when GDT\_TS is over 0.6.

The comparison is summarized in Fig. S3, Tables S1 and S2.

FALCON\_TOPO server also shows the advantage in remote homologue identification. Take the target T0678 as an example; the challenge was to determine how to align the three N-terminal strands. Using the pre-calculated common frameworks, the FALCON@home successfully identified the most similar template as [4gt6\\_A](#) and finally generated a high-quality prediction model with a TM-score [9] of 0.84 to the native structure (Fig. S4).

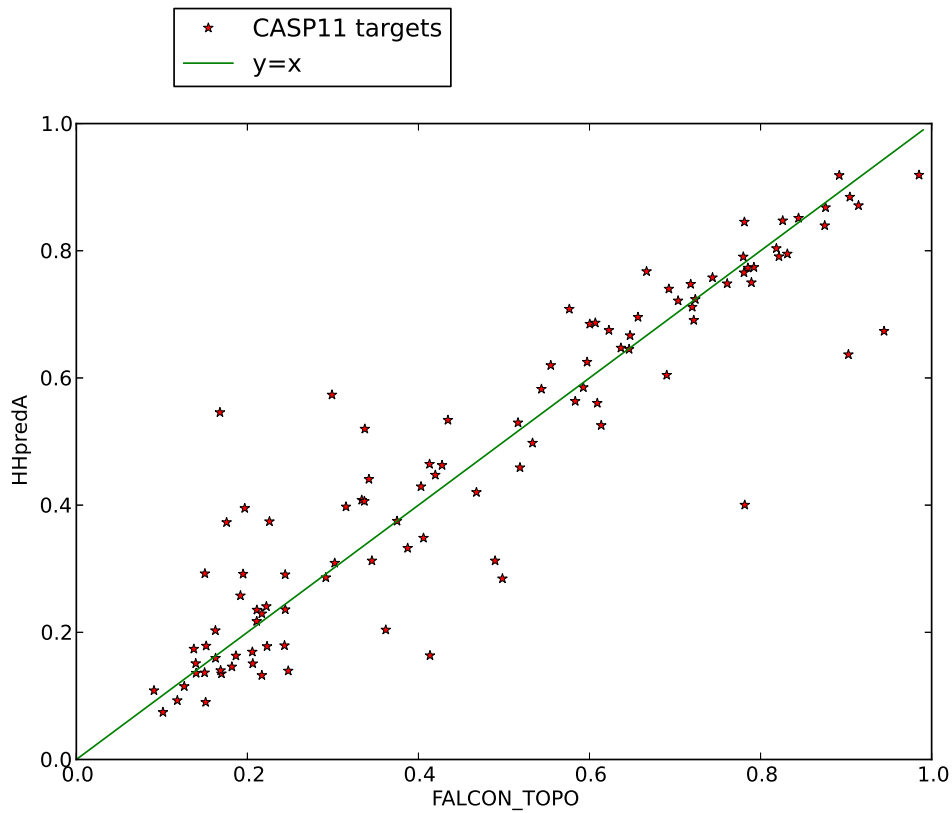

Figure S3: Comparison of FALCON\_TOPO with HHpredA using the GDT\_TS measure over 105 CASP11 domains. Over the total of 105 CASP 11 domains, FALCON\_TOPO showed comparable performance with HHpredA, and outperformed HHpredA when GDT\_TS is over 0.6.

| Domain   | HHpredA | FALCON_TOPO |
|----------|---------|-------------|
| T0759-D1 | 0.9191  | 0.9853      |
| T0759-D2 | 0.3750  | 0.3750      |
| T0760-D1 | 0.7400  | 0.6928      |
| T0761-D1 | 0.2358  | 0.2443      |
| T0761-D2 | 0.1792  | 0.2434      |
| T0762-D1 | 0.8473  | 0.8259      |
| T0763-D1 | 0.1365  | 0.1500      |
| T0764-D1 | 0.7578  | 0.7438      |
| T0765-D1 | 0.4408  | 0.3421      |
| T0766-D1 | 0.6736  | 0.9444      |
| T0767-D1 | 0.2039  | 0.3618      |
| T0767-D2 | 0.1458  | 0.1819      |
| T0768-D1 | 0.4003  | 0.7815      |
| T0769-D1 | 0.5851  | 0.5928      |
| T0770-D1 | 0.6848  | 0.6003      |
| T0771-D1 | 0.1738  | 0.1374      |
| T0772-D1 | 0.6472  | 0.6367      |
| T0773-D1 | 0.6045  | 0.6903      |
| T0774-D1 | 0.4474  | 0.4197      |
| T0776-D1 | 0.8037  | 0.8185      |
| T0777-D1 | 0.0928  | 0.1181      |
| T0780-D1 | 0.7237  | 0.7237      |
| T0780-D2 | 0.6198  | 0.5547      |
| T0781-D1 | 0.1150  | 0.1262      |
| T0781-D2 | 0.3729  | 0.1757      |
| T0782-D1 | 0.6750  | 0.6227      |
| T0783-D1 | 0.7675  | 0.6667      |
| T0783-D2 | 0.1635  | 0.4135      |
| T0784-D1 | 0.8680  | 0.8760      |
| T0785-D1 | 0.1786  | 0.1518      |
| T0786-D1 | 0.6452  | 0.6463      |
| T0789-D1 | 0.2028  | 0.1626      |
| T0789-D2 | 0.1508  | 0.2063      |
| T0790-D1 | 0.2352  | 0.2111      |
| T0790-D2 | 0.1692  | 0.2058      |
| T0791-D1 | 0.1594  | 0.1628      |
| T0791-D2 | 0.1630  | 0.1866      |
| T0792-D1 | 0.6667  | 0.6474      |
| T0794-D1 | 0.6866  | 0.6068      |
| T0794-D2 | 0.0901  | 0.1512      |
| T0796-D1 | 0.4645  | 0.4130      |
| T0800-D1 | 0.4080  | 0.3337      |
| T0801-D1 | 0.8514  | 0.8444      |
| T0803-D1 | 0.4291  | 0.4030      |
| T0805-D1 | 0.7475  | 0.7183      |
| T0806-D1 | 0.1084  | 0.0908      |
| T0807-D1 | 0.7951  | 0.8313      |
| T0808-D1 | 0.5458  | 0.1679      |
| T0808-D2 | 0.0743  | 0.1013      |
| T0810-D1 | 0.1394  | 0.2478      |
| T0810-D2 | 0.6956  | 0.6567      |

Table S1: Comparison FALCON\_TOPO and HHpredA using the GDT\_TS measures over CASP11 targets (Part I, from T0759 to T0810)

| Domain   | HHpredA | FALCON_TOPO |
|----------|---------|-------------|
| T0811-D1 | 0.8845  | 0.9044      |
| T0812-D1 | 0.3324  | 0.3874      |
| T0813-D1 | 0.7740  | 0.7922      |
| T0814-D1 | 0.1350  | 0.1697      |
| T0814-D2 | 0.1358  | 0.1401      |
| T0814-D3 | 0.4062  | 0.3368      |
| T0815-D1 | 0.8396  | 0.8750      |
| T0816-D1 | 0.3125  | 0.3456      |
| T0817-D1 | 0.8453  | 0.7811      |
| T0817-D2 | 0.7905  | 0.7798      |
| T0818-D1 | 0.3974  | 0.3153      |
| T0819-D1 | 0.7909  | 0.8215      |
| T0820-D1 | 0.2861  | 0.2917      |
| T0820-D2 | 0.6250  | 0.5972      |
| T0821-D1 | 0.5255  | 0.6137      |
| T0822-D1 | 0.4627  | 0.4276      |
| T0823-D1 | 0.5634  | 0.5833      |
| T0824-D1 | 0.2407  | 0.2222      |
| T0827-D1 | 0.3951  | 0.1969      |
| T0827-D2 | 0.2917  | 0.1950      |
| T0829-D1 | 0.4590  | 0.5187      |
| T0830-D1 | 0.3483  | 0.4059      |
| T0830-D2 | 0.1779  | 0.2230      |
| T0831-D1 | 0.3742  | 0.2258      |
| T0831-D2 | 0.1510  | 0.1396      |
| T0832-D1 | 0.1400  | 0.1687      |
| T0833-D1 | 0.7083  | 0.5764      |
| T0834-D1 | 0.2576  | 0.1919      |
| T0834-D2 | 0.2907  | 0.2442      |
| T0835-D1 | 0.4202  | 0.4678      |
| T0836-D1 | 0.1324  | 0.2169      |
| T0837-D1 | 0.2293  | 0.2169      |
| T0838-D1 | 0.5337  | 0.4345      |
| T0840-D1 | 0.6368  | 0.9027      |
| T0840-D2 | 0.5734  | 0.2989      |
| T0841-D1 | 0.8712  | 0.9145      |
| T0843-D1 | 0.7730  | 0.7852      |
| T0845-D1 | 0.5825  | 0.5438      |
| T0845-D2 | 0.4977  | 0.5334      |
| T0847-D1 | 0.6908  | 0.7219      |
| T0848-D1 | 0.2844  | 0.4982      |
| T0848-D2 | 0.2923  | 0.1503      |
| T0849-D1 | 0.5604  | 0.6091      |
| T0851-D1 | 0.7483  | 0.7610      |
| T0852-D1 | 0.7115  | 0.7201      |
| T0852-D2 | 0.5198  | 0.3373      |
| T0853-D1 | 0.5296  | 0.5164      |
| T0853-D2 | 0.3090  | 0.3021      |
| T0854-D1 | 0.9186  | 0.8920      |
| T0854-D2 | 0.7214  | 0.7036      |
| T0855-D1 | 0.2174  | 0.2109      |
| T0856-D1 | 0.7500  | 0.7893      |
| T0857-D1 | 0.3125  | 0.4896      |
| T0858-D1 | 0.7656  | 0.7806      |

Table S2: Comparison FALCON\_TOPO and HHpredA using the GDT\_TS measures over CASP11 targets (Part II, from T0811 to T0858)



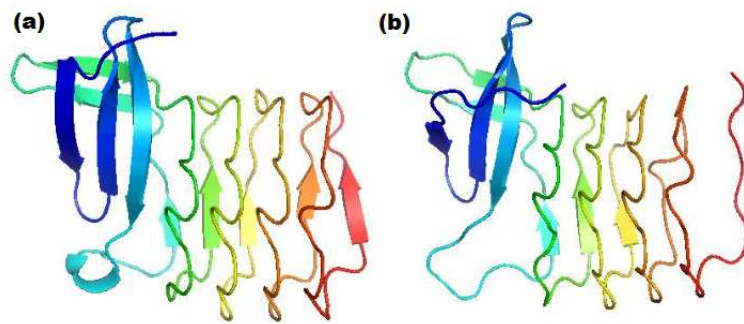

Figure S4: (a) Native structure of TBM protein T0768. (b) Prediction model of T0768 by FALCON\_TOPO with a TM-score=0.84 compared with the native structure.

## 5 Comparison of FALCON@home with HHsearch+Modeller over 1263 PDB70 domains

Besides the CASP11 targets, we also compared FALCON@home against HHsearch+Modeller over a collection of 1263 PDB70 proteins whose native structures were released after the CASP11 evaluation. The 1263 PDB70 proteins were selected from all proteins with newly-released structures by filtering out the proteins that are too short (length < 50) or multiple-domains. The list of the 1263 proteins can be downloaded from the following website: <http://protein.ict.ac.cn/FALCON/testset-1263proteins.tgz>.

To avoid the overlap between query proteins and the template databases, both FALCON@home and HHsearch were executed over the template databases built before the CASP11 evaluation. Over these proteins, FALCON@home exhibited an average GDT\_TS score of 0.68, which is slightly higher than HHsearch+Modeller (0.66). However, FALCON@home is more efficient: it took ~23 hours for FALCON@home to make predictions for the 1263 proteins, while HHsearch+Modeller used ~74 hours.

The comparison is graphically shown in Fig. S5.

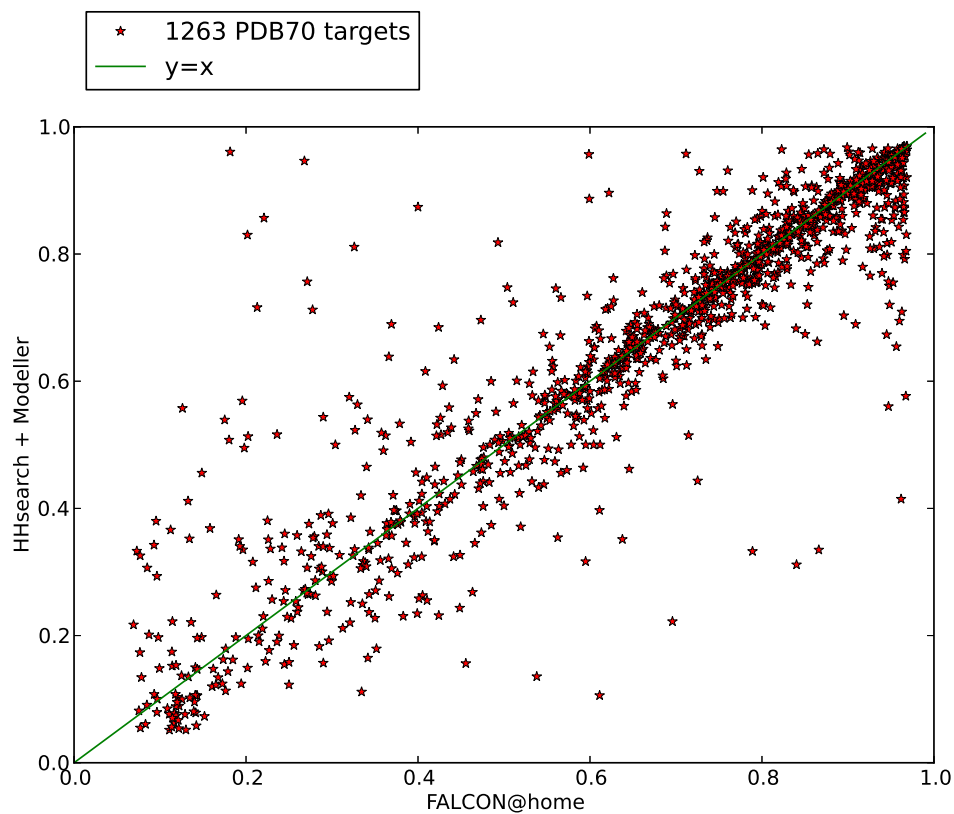

Figure S5: Comparison of FALCON@home with HHsearch+Modeller using the GDT\_TS measure over 1263 PDB70 domains with native structures released after the CASP11 evaluation. Over the 1263 PDB70 proteins, FALCON@home exhibited an average GDT\_TS score of 0.68, which is slightly higher than HHsearch+Modeller (0.66).

## References

- [1] Zhu J, Zhang H, Wang C, Ling B, Zheng WM, Bu D. TOPO: Improving remote homologue recognition via identifying common protein structure framework. arXiv preprint arXiv:150703197. 2015;.
- [2] Wu W, Chen G, Kan W, Anderson D, Grey F, Li J, et al. Harness public computing resources for protein structure prediction computing. In: The International Symposium on Grids and Clouds (ISGC). vol. 2013; 2013. .
- [3] Zhang H, Shao M, Wang C, Zhu J, Zheng WM, Bu D. Improving protein threading accuracy via combining local and global potential using TreeCRF model. arXiv preprint arXiv:150903434. 2015;.
- [4] Eswar N, Webb B, Marti-Renom MA, Madhusudhan M, Eramian D, Shen My, et al. Comparative protein structure modeling using Modeller. *Current protocols in bioinformatics*. 2006;p. 5–6.
- [5] Yang Y, Zhou Y. Specific interactions for ab initio folding of protein terminal regions with secondary structures. *Proteins: Structure, Function, and Bioinformatics*. 2008;72(2):793–803.
- [6] Li SC, Bu D, Xu J, Li M. Fragment-HMM: A new approach to protein structure prediction. *Protein Science*. 2008;17(11):1925–1934.
- [7] Wang C, Wei Y, Liu J, Zhang H, Ling B, Li SC, et al. Optimizing weights of protein energy function to improve ab initio protein structure prediction. arXiv preprint arXiv:13126960. 2013;.
- [8] Simons KT, Kooperberg C, Huang E, Baker D. Assembly of protein tertiary structures from fragments with similar local sequences using simulated annealing and Bayesian scoring functions. *Journal of molecular biology*. 1997;268(1):209–225.
- [9] Zhang Y, Skolnick J. Scoring function for automated assessment of protein structure template quality. *Proteins: Structure, Function, and Bioinformatics*. 2004;57(4):702–710.
